# Supplementary material for: Temporal Analysis of a Japanese Online Forum for Suicide Risk Monitoring
Source: Research Square preprint supplement (doi:10.21203/rs.3.rs-7442638/v1), 2025-10-01
Supplement: Supplementary file 2 [file 2bbf35f3a581f63129c3c44e.xlsx]

## Sheet: Sheet1
Table 1. Number of posts and relative frequency (%) by gender, age, month, day of the week, and time of day (hour) in the NHK forum (N = 63,046).
Category	Variable	N	(%)
Gender
	Males	15444	(24.5)
	Females	47602	(75.5)
Age
	≤ 19 y	12805	(20.3)
	20–29 y	20418	(32.4)
	30–39 y	11830	(18.8)
	≥ 40 y	17993	(28.5)
Month
	Jan	4774	(7.6)
	Feb	4802	(7.6)
	Mar	5532	(8.8)
	Apr	5241	(8.3)
	May	5635	(8.9)
	Jun	4818	(7.6)
	Jul	5381	(8.5)
	Aug	5994	(9.5)
	Sep	5526	(8.8)
	Oct	5209	(8.3)
	Nov	5273	(8.4)
	Dec	4861	(7.7)
Day of the week
	Sun	9364	(14.9)
	Mon	9748	(15.5)
	Thu	9308	(14.8)
	Wed	9264	(14.7)
	Tue	9174	(14.6)
	Fri	8138	(12.9)
	Sat	8050	(12.8)
Time of day (Hour)
	00:00:00	5333	(8.5)
	01:00:00	4077	(6.5)
	02:00:00	2840	(4.5)
	03:00:00	1993	(3.2)
	04:00:00	1309	(2.1)
	05:00:00	963	(1.5)
	06:00:00	881	(1.4)
	07:00:00	1071	(1.7)
	08:00:00	1432	(2.3)
	09:00:00	1423	(2.3)
	10:00:00	1622	(2.6)
	11:00:00	1892	(3.0)
	12:00:00	1945	(3.1)
	13:00:00	2009	(3.2)
	14:00:00	2049	(3.3)
	15:00:00	2077	(3.3)
	16:00:00	2261	(3.6)
	17:00:00	2595	(4.1)
	18:00:00	2715	(4.3)
	19:00:00	3038	(4.8)
	20:00:00	3688	(5.9)
	21:00:00	4707	(7.5)
	22:00:00	5355	(8.5)
	23:00:00	5771	(9.2)
